# Supplementary material for: Label-free proteomics uncovers SMC1A expression is Down-regulated in AUB-E
Source: Springer Nature journal article supplement (doi:10.1186/s12958-021-00713-4), 2021-03-02
Supplement: MOESM5 [file 18921258]

**Table S5. The clinical details of the other 20 subjects for IHC.**

| <b>Clinical characteristic</b>              | <b>AUB-E</b><br>n = 10 | <b>Control</b><br>n = 10 | <b>P value</b>       |
|---------------------------------------------|------------------------|--------------------------|----------------------|
| <b>Age, years</b>                           |                        |                          |                      |
| Mean (SD)                                   | 43 (6)                 | 39 (6)                   | 0.239 <sup>b</sup>   |
| <b>Menarche, years</b>                      |                        |                          |                      |
| Median (P <sub>25</sub> , P <sub>75</sub> ) | 14 (13, 14)            | 14 (13, 14)              | 0.489 <sup>a</sup>   |
| <b>Body-mass index, kg/m<sup>2</sup></b>    |                        |                          |                      |
| Mean (SD)                                   | 21.48 (2.38)           | 21.68 (1.74)             | 0.828 <sup>b</sup>   |
| <b>Menstruation duration, days</b>          |                        |                          |                      |
| Mean (SD)                                   | 5.5 (1.4)              | 5.6 (1.4)                | 0.870 <sup>b</sup>   |
| <b>Menstrual cycle length, days</b>         |                        |                          |                      |
| Median (P <sub>25</sub> , P <sub>75</sub> ) | 30 (29.5, 30)          | 30 (28, 31)              | 0.932 <sup>a</sup>   |
| <b>PBAC score</b>                           |                        |                          |                      |
| Median (P <sub>25</sub> , P <sub>75</sub> ) | 137 (120, 145)         | 68 (63.8, 74.3)          | 0.000 <sup>a,*</sup> |

n, the number of subjects.

<sup>a</sup>P value for the Mann–Whitney U-test. <sup>b</sup>P value for the *t*-test.

\*:  $P < 0.05$ , which denoted a significant difference between control and AUB-E groups.
