# Supplementary material for: Label-free proteomics uncovers SMC1A expression is Down-regulated in AUB-E
Source: Springer Nature journal article supplement (doi:10.1186/s12958-021-00713-4), 2021-03-02

E.vs.C

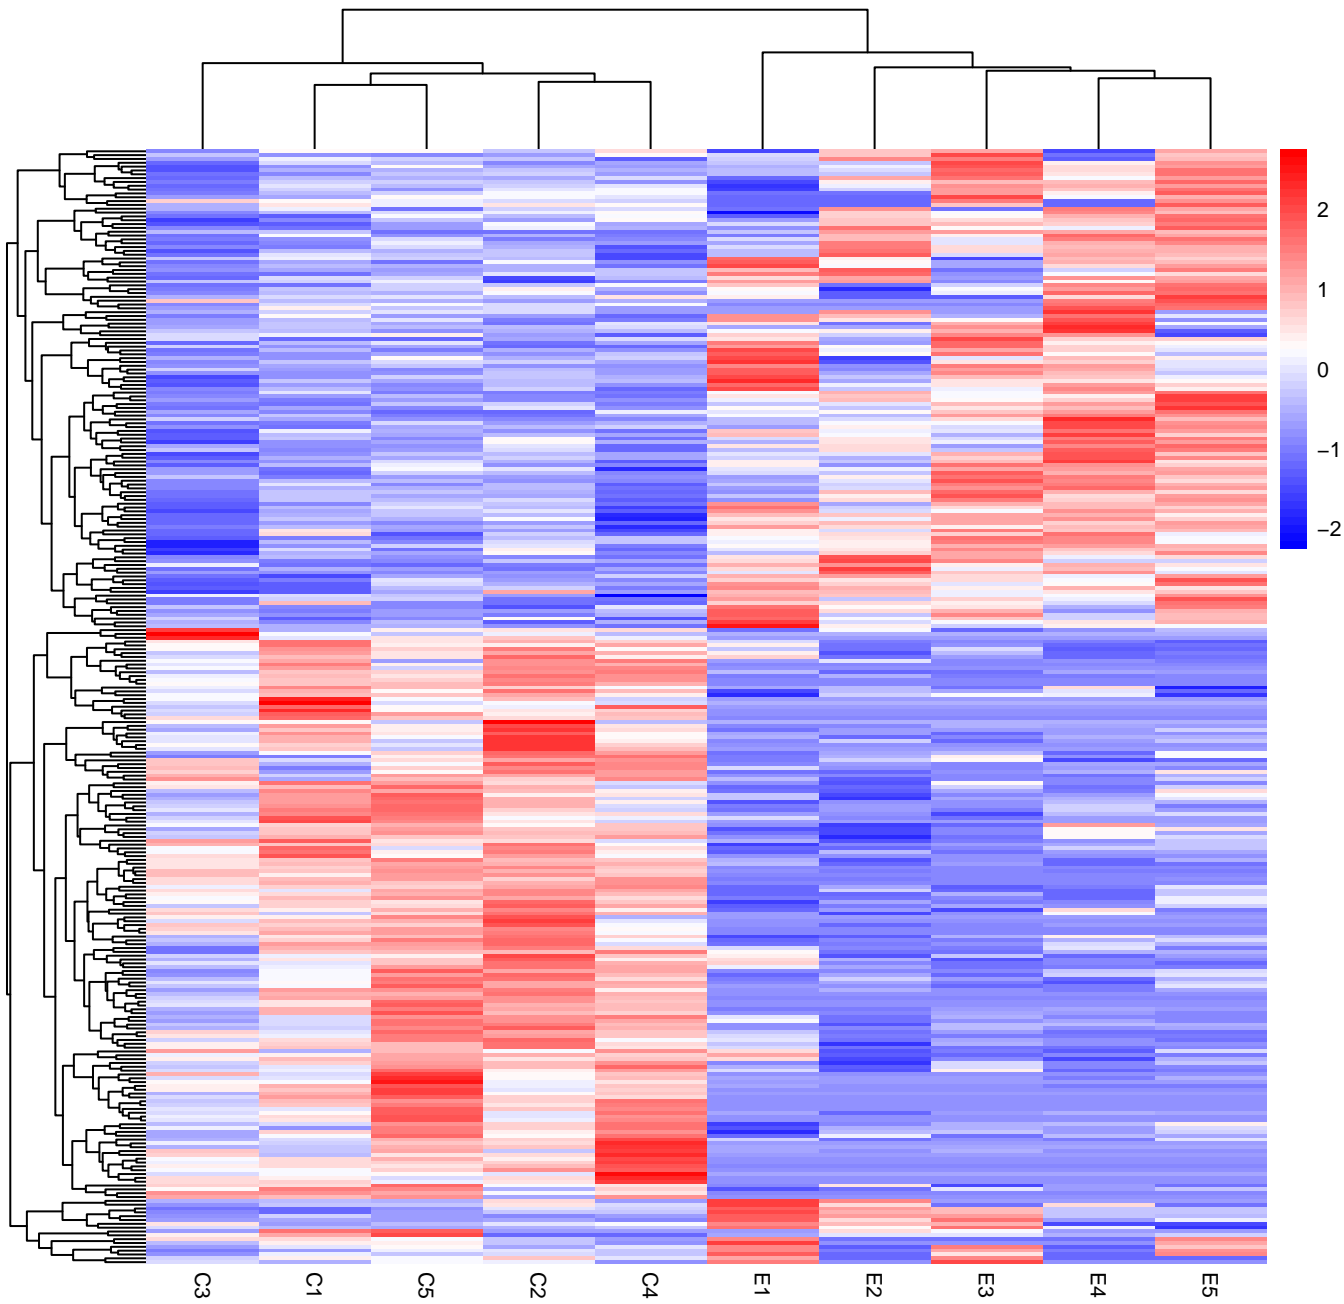

Supplement: MOESM6 [file 18921258]
